# Supplementary material
Source: PubMed Central journal article supplement (PMC4501688)
Supplement: Supp_Fig1.pdf [file Supp_Fig1.pdf]

## Supplementary Data

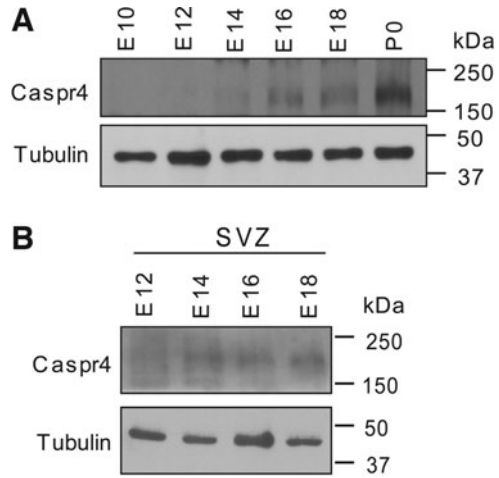

**SUPPLEMENTARY FIG. S1.** Expression of contactin-associated protein 4 (Caspr4) in the developing cortex. **(A)** Western blot analysis of the expression of Caspr4 in the cortex of different embryonic stage as indicated. **(B)** Western blot analysis of the expression of Caspr4 in the subventricular zone (SVZ) of different embryonic stage as indicated.
