# Supplementary material
Source: PubMed Central journal article supplement (PMC4501688)
Supplement: Supp_Fig2.pdf [file Supp_Fig2.pdf]

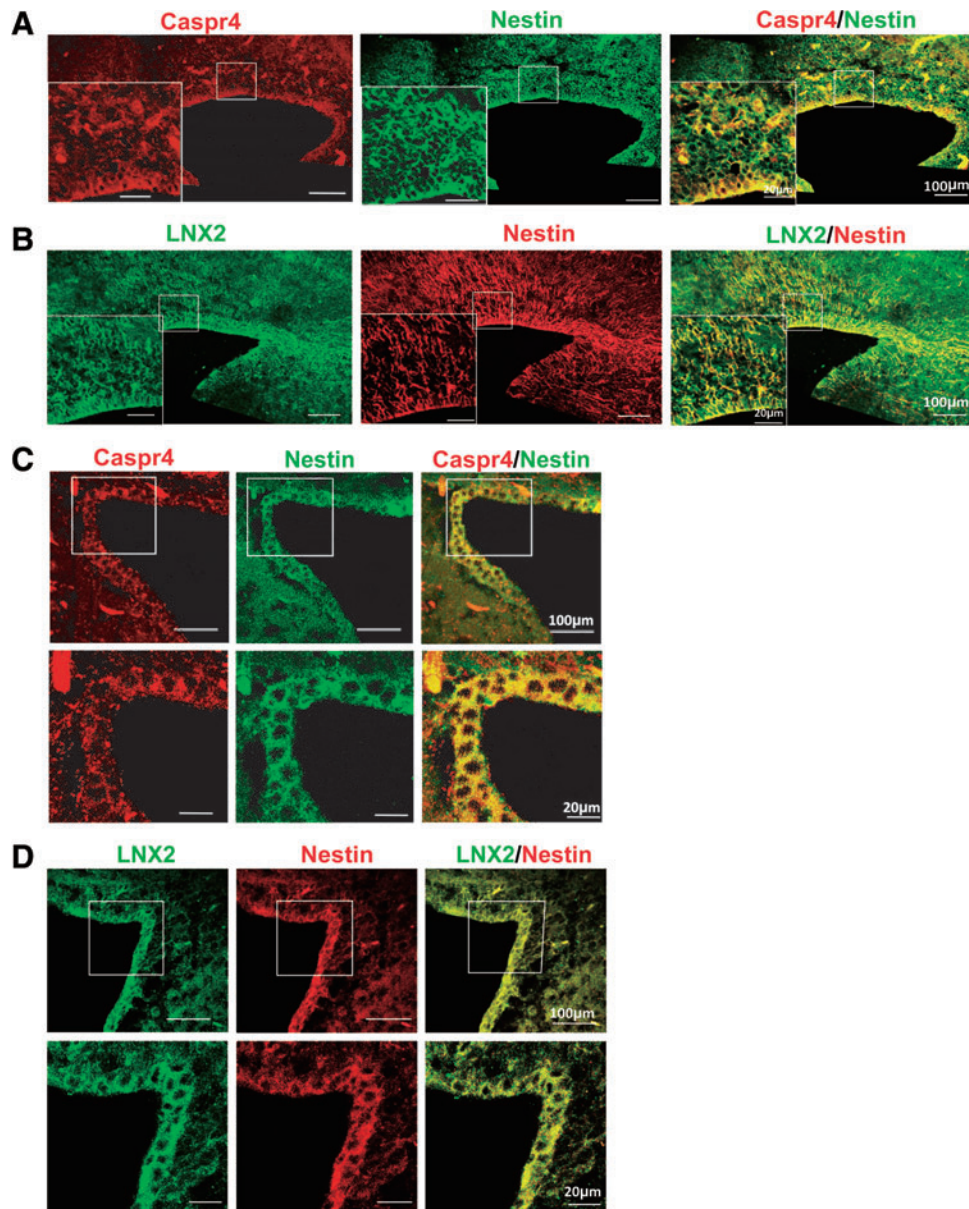

**SUPPLEMENTARY FIG. S2.** Expression of Caspr4 and LNX2 in neural progenitor cells (NPCs) in P0 and adult SVZ. (A–D) Double immunostaining for Caspr4 (A, C) or Ligand of Numb protein X2 (LNX2) (B, D) and Nestin and in the SVZ of P0 (A, B) and adult (C, D) mouse brain. Scale bar: 100 µm in images in lower magnification, 20 µm in images in higher magnification.
