# Supplementary material
Source: PubMed Central journal article supplement (PMC4501688)
Supplement: Supp_Fig3.pdf [file Supp_Fig3.pdf]

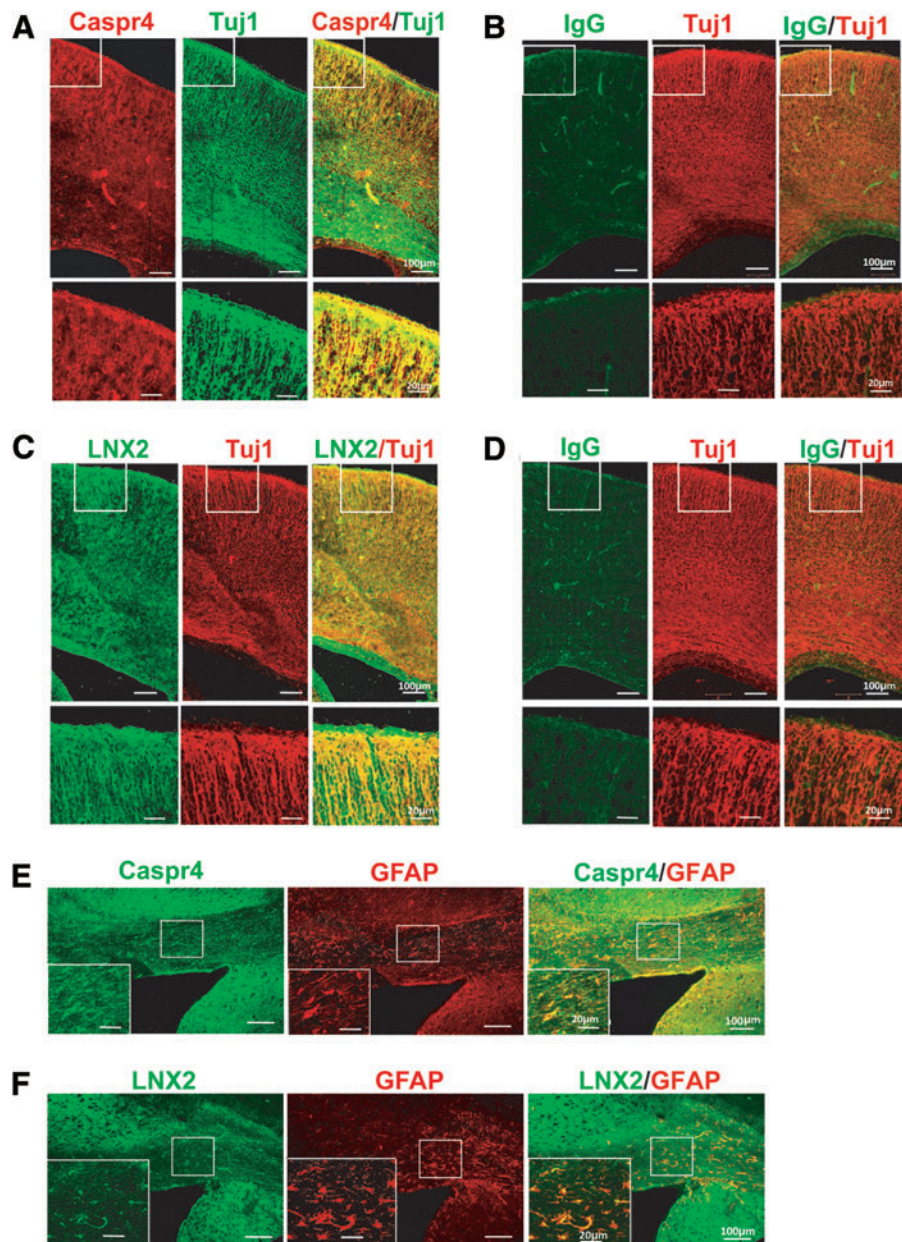

**SUPPLEMENTARY FIG. S3.** Expression of Caspr4 and LNX2 in cortical neurons and astrocytes. (A, C) Immunostaining for Caspr4 (A), LNX2 (C), and  $\beta$ III-tubulin in the cerebral cortex at P0. (B, D) Immunostaining on the cerebral cortex at P0 with non-immunoglobulin (IgG). (E, F) Immunostaining for Caspr4 (E), LNX2 (F), and glial fibrillary acidic protein (GFAP) in adult corpus callosum. Scale bar: 100  $\mu$ m in images in lower magnification, 20  $\mu$ m in images in higher magnification.
