# Supplementary material
Source: PubMed Central journal article supplement (PMC4501688)
Supplement: Supp_Fig4.pdf [file Supp_Fig4.pdf]

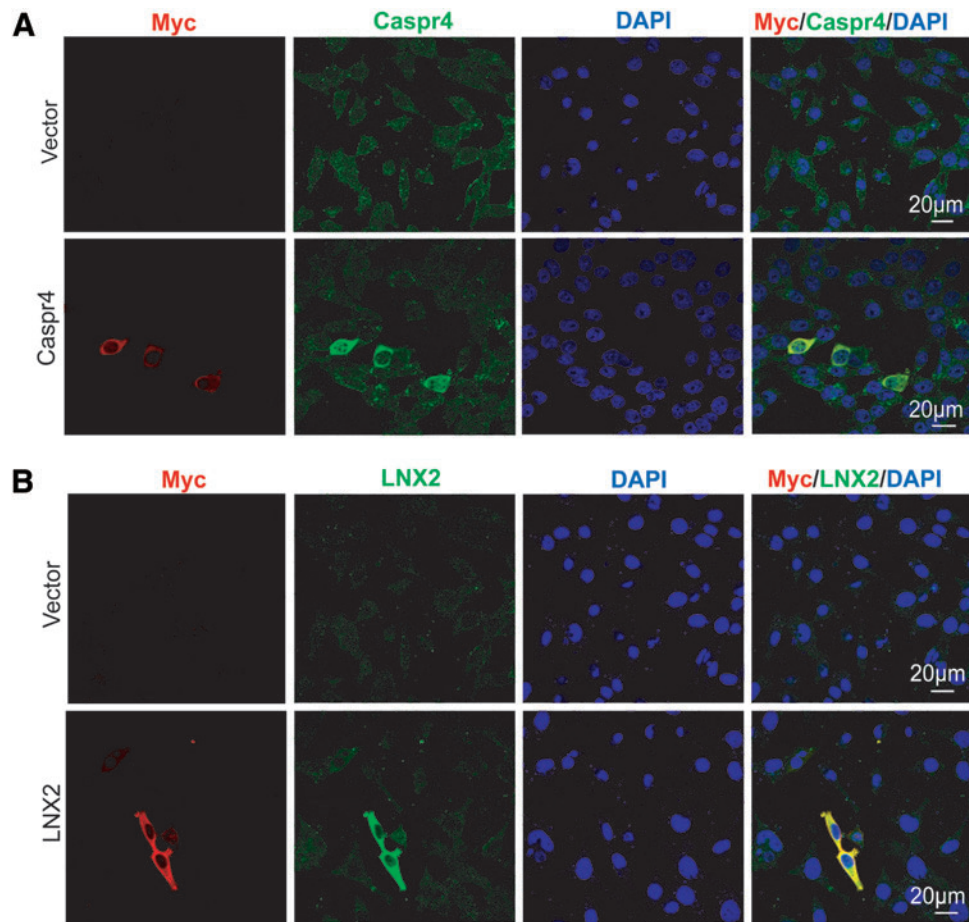

**SUPPLEMENTARY FIG. S4.** Validation of antibodies against Caspr4 and LNX2. HEK293 cells transfected with Caspr4-myc (**A**) or LNX2-myc (**B**) or an empty vector as the control were stained for myc and Caspr4 (**A**) or LNX2 (**B**). Caspr4 and LNX2 immunoreactivity were detected in Caspr4-myc- and LNX2-myc-transfected cells and colocalized with myc, respectively. Scale bars: 20  $\mu$ m.
