# Supplementary material
Source: PubMed Central journal article supplement (PMC4501688)
Supplement: Supp_Fig5.pdf [file Supp_Fig5.pdf]

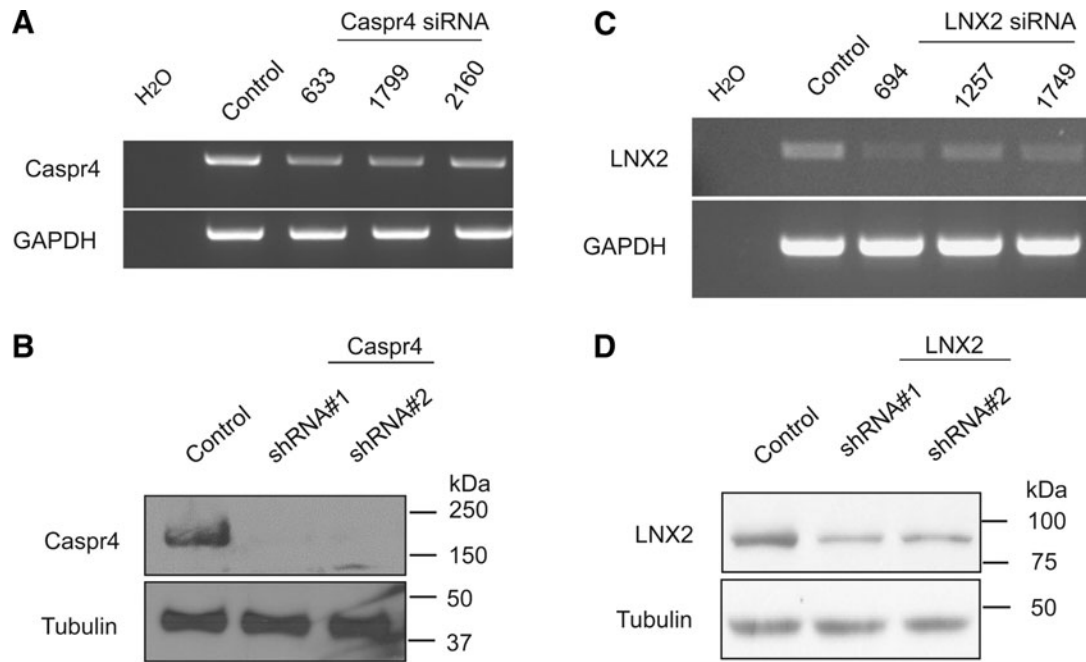

**SUPPLEMENTARY FIG. S5.** Validation of small interference RNA (siRNA) and small hairpin RNA (shRNA) of Caspr4 and LNX2. (**A, C**) Caspr4 siRNAs (633, 1,799, and 2,160); (**A**) LNX2 siRNAs (694, 1,257, and 1,749); (**C**) or the scrambled siRNA (NC) were transfected into NPCs. Reverse transcription–polymerase chain reaction was performed to analyze the mRNA levels of Caspr4 (**A**) and LNX2 (**C**) at 48 h after transfection. GAPDH was detected as loading control. siRNAs 633 and 694 were used to knockdown the expression of Caspr4 and Lnx2 in NPCs, respectively. (**B**) Caspr4 shRNAs (Caspr4 shRNA#1 and 2) and Caspr4 cDNA were cotransfected into HEK293T cells. The cells were harvested at 48 h after transfection and subjected to western blot analysis using antibodies against Caspr4.  $\gamma$ -Tubulin (tubulin) was detected as a loading control. (**D**) LNX2 shRNAs (LNX2 shRNA#1 and 2) and LNX2 cDNA were cotransfected into HEK293T cells. The cells were harvested at 48 h after transfection and subjected to western blot analysis using antibodies against LNX2.  $\gamma$ -Tubulin (tubulin) was detected as a loading control.
