# Supplementary material
Source: PubMed Central journal article supplement (PMC4501688)
Supplement: Supp_Fig6.pdf [file Supp_Fig6.pdf]

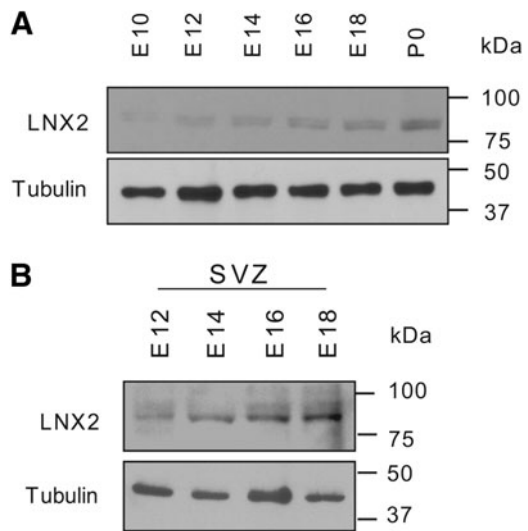

**SUPPLEMENTARY FIG. S6.** Expression of LNK2 in the developing cortex. **(A)** Western blot analysis of the expression of LNK2 in the cortex of different embryonic stage as indicated. **(B)** Western blot analysis of the expression of LNK2 in the VZ of different embryonic stage as indicated.
